# Supplementary material for: Instability of Healthy Overweight and Obesity Phenotypes over the Long Term in Young Participants in the HARVEST Study: Influence of Sex
Source: MDPI journal article supplement (doi:10.3390/jcdd11020047), 2024-01-31

Figure 1S. Classification of 970 HARVEST participants grouped according to BMI (kg/m<sup>2</sup>) and metabolic status, stratified by sex. Subjects without any abnormal parameter were defined as being metabolically healthy (Metab -). Data at baseline.

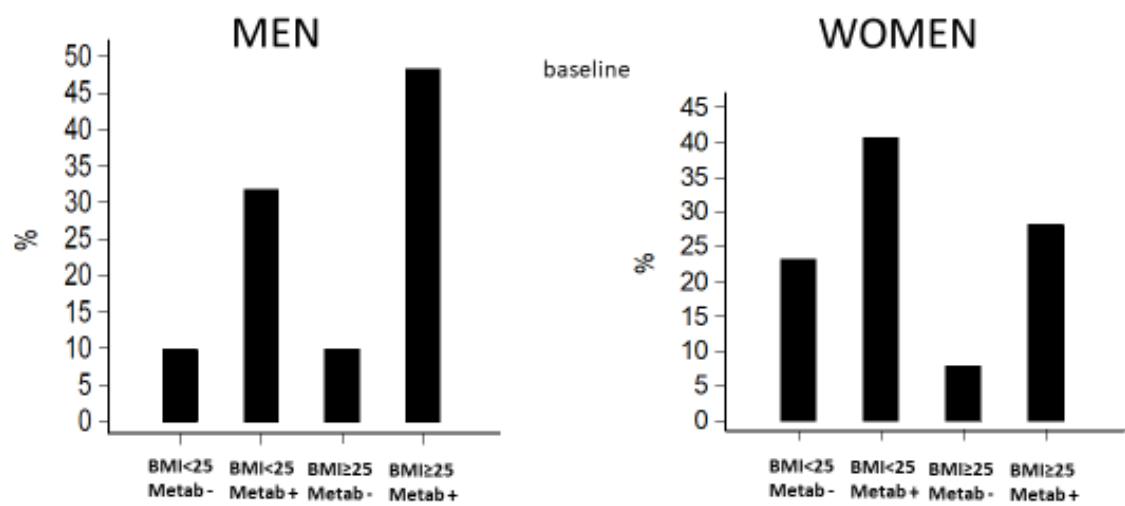

Figure 2S. Classification of 970 HARVEST participants grouped according to BMI (kg/m<sup>2</sup>) and metabolic, stratified by sex. Subjects without any abnormal parameter were defined as being metabolically healthy (Metab -). Data at follow-up end.

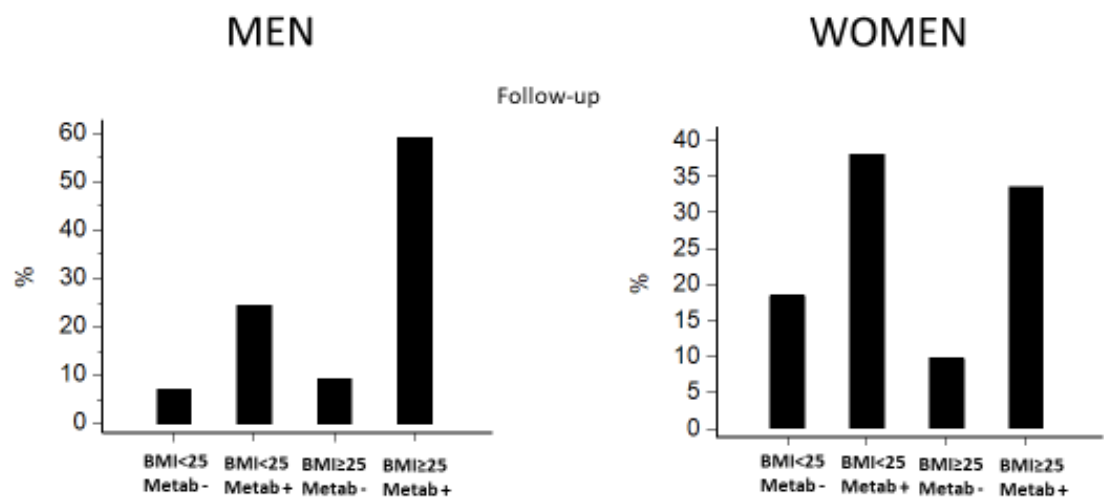

Supplement: s1 [file s1]
